# Supplementary material for: Hierarchically nanoporous La1.7Ca0.3CuO4−δ and La1.7Ca0.3NixCu1−xO4−δ (0.25 ≤ x ≤ 0.75) as potential cathode materials for IT-SOFCs
Source: Royal Society of Chemistry journal article supplement (doi:10.1039/c5ta00983a), 2015-01-01
Supplement: c5ta00983a1.pdf [file c5ta00983a1.pdf]

## Supporting Information

### Hierarchically Nanoporous $\text{La}_{1.7}\text{Ca}_{0.3}\text{CuO}_{4-\delta}$ and $\text{La}_{1.7}\text{Ca}_{0.3}\text{Ni}_x\text{Cu}_{1-x}\text{O}_{4-\delta}$ ( $0.25 \leq x \leq 0.75$ ) as Potential Cathode Materials for IT-SOFCs

Xiubing Huang, Tae Ho Shin, Jun Zhou and John T.S. Irvine\*

*School of Chemistry, University of St Andrews, St Andrews, Fife, United Kingdom*

*Email: jtsi@st-andrews.ac.uk*

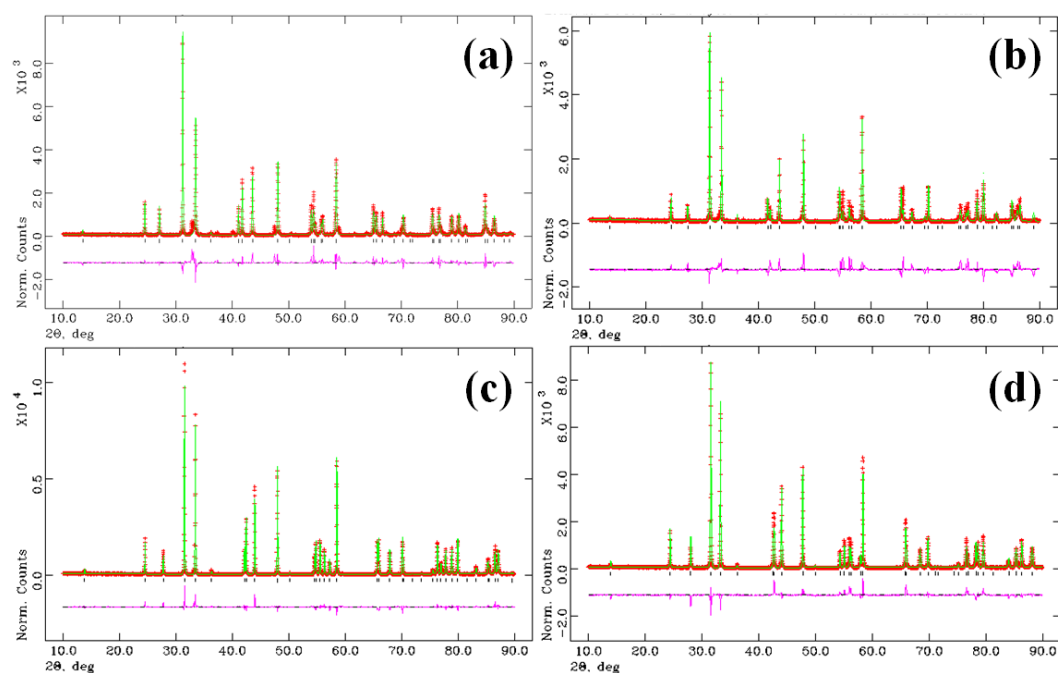

Figure S1. Observed (points) and calculated (full curve) XRD patterns using I4/mmm model for  $\text{La}_{1.7}\text{Ca}_{0.3}\text{Ni}_x\text{Cu}_{1-x}\text{O}_{4-\delta}$ : (a)  $\text{La}_{1.7}\text{Ca}_{0.3}\text{CuO}_{4-\delta}$ , (b)  $\text{La}_{1.7}\text{Ca}_{0.3}\text{Ni}_{0.25}\text{Cu}_{0.75}\text{O}_{4-\delta}$ , (c)  $\text{La}_{1.7}\text{Ca}_{0.3}\text{Ni}_{0.5}\text{Cu}_{0.5}\text{O}_{4-\delta}$ , (d)  $\text{La}_{1.7}\text{Ca}_{0.3}\text{Ni}_{0.75}\text{Cu}_{0.25}\text{O}_{4-\delta}$ .

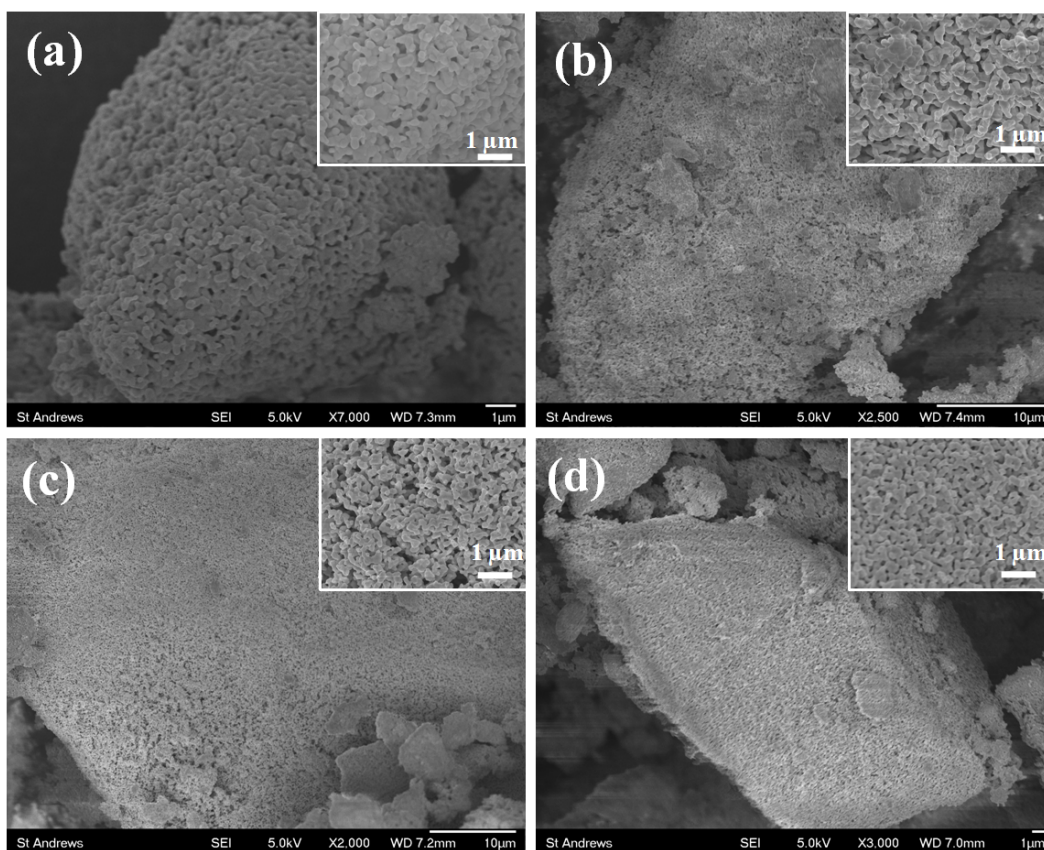

Figure S2. FESEM images of  $\text{La}_{1.7}\text{Ca}_{0.3}\text{Ni}_x\text{Cu}_{1-x}\text{O}_{4-\delta}$  after calcination at 900 °C for 2 h:

(a)  $\text{La}_{1.7}\text{Ca}_{0.3}\text{CuO}_{4-\delta}$ , (b)  $\text{La}_{1.7}\text{Ca}_{0.3}\text{Ni}_{0.25}\text{Cu}_{0.75}\text{O}_{4-\delta}$ , (c)  $\text{La}_{1.7}\text{Ca}_{0.3}\text{Ni}_{0.5}\text{Cu}_{0.5}\text{O}_{4-\delta}$ ,  
(d)  $\text{La}_{1.7}\text{Ca}_{0.3}\text{Ni}_{0.75}\text{Cu}_{0.25}\text{O}_{4-\delta}$ . Inset are their SEM images with higher magnification.

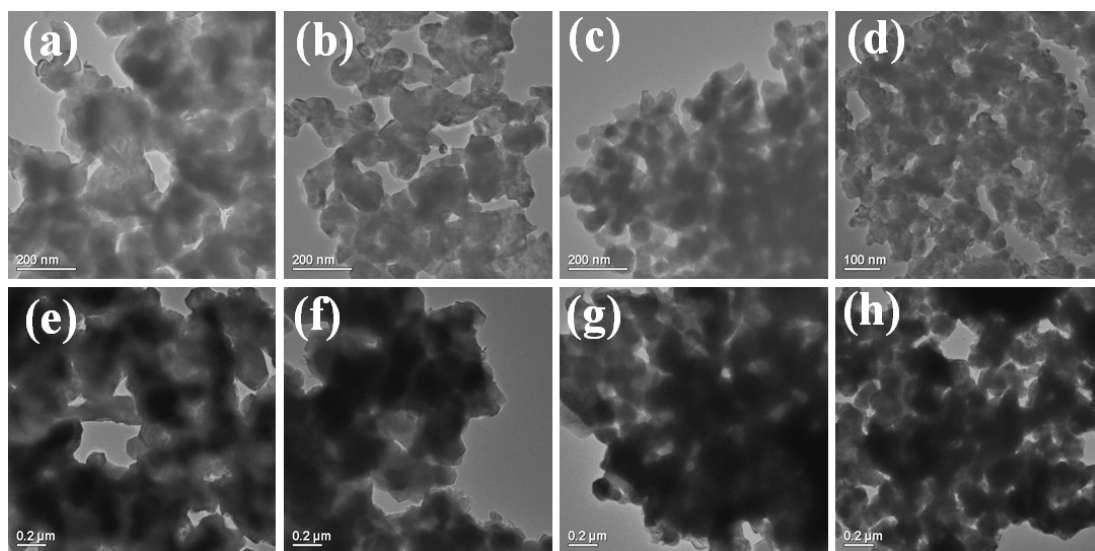

Figure S3. TEM images of  $\text{La}_{1.7}\text{Ca}_{0.3}\text{Ni}_x\text{Cu}_{1-x}\text{O}_{4-\delta}$  after calcination at 750 °C (a-d) and 900 °C (e-h) for 2 h: (a, e)  $\text{La}_{1.7}\text{Ca}_{0.3}\text{CuO}_{4-\delta}$ , (b, f)  $\text{La}_{1.7}\text{Ca}_{0.3}\text{Ni}_{0.25}\text{Cu}_{0.75}\text{O}_{4-\delta}$ , (c, g)  $\text{La}_{1.7}\text{Ca}_{0.3}\text{Ni}_{0.5}\text{Cu}_{0.5}\text{O}_{4-\delta}$ , (d, h)  $\text{La}_{1.7}\text{Ca}_{0.3}\text{Ni}_{0.75}\text{Cu}_{0.25}\text{O}_{4-\delta}$ .

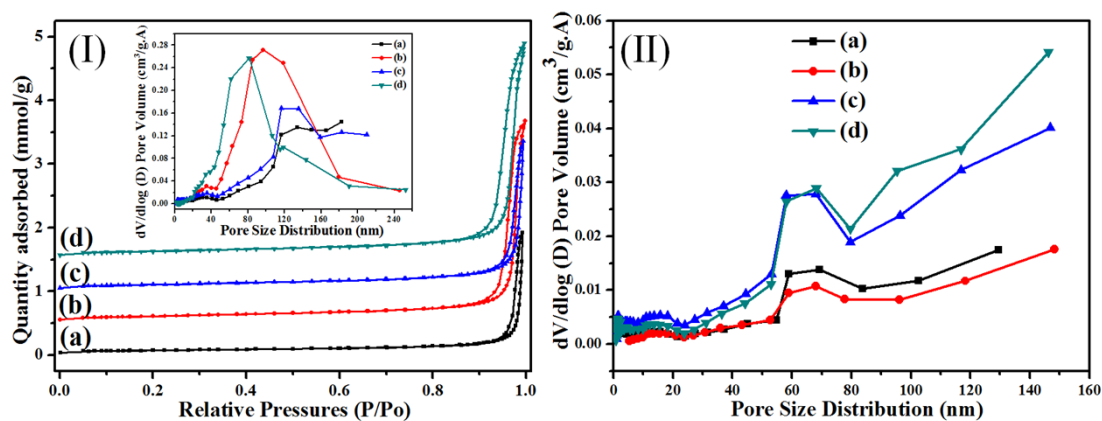

Figure S4. (I)  $N_2$  adsorption/desorption isothermal curves of  $La_{1.7}Ca_{0.3}Ni_xCu_{1-x}O_{4-\delta}$  samples after calcination at 750 °C and (II) pore size distribution curves after calcination at 900 °C for 2 h: (a)  $La_{1.7}Ca_{0.3}CuO_{4-\delta}$ , (b)  $La_{1.7}Ca_{0.3}Ni_{0.25}Cu_{0.75}O_{4-\delta}$ , (c)  $La_{1.7}Ca_{0.3}Ni_{0.5}Cu_{0.5}O_{4-\delta}$ , (d)  $La_{1.7}Ca_{0.3}Ni_{0.75}Cu_{0.25}O_{4-\delta}$ . Inset of (I) is the pore size distribution curves for  $La_{1.7}Ca_{0.3}Ni_xCu_{1-x}O_{4-\delta}$  obtained at 750 °C for 2 h.

**Table S1.** Textural properties of perovskites obtained at 750 °C and 900 °C for 2 h

| Temperature | Sample                                           | BET<br>( $m^2\ g^{-1}$ ) | Pore Volume<br>( $cm^3\ g^{-1}$ ) | Average pore<br>size<br>(nm) |
|-------------|--------------------------------------------------|--------------------------|-----------------------------------|------------------------------|
| 750 °C      | $La_{1.7}Ca_{0.3}CuO_{4-\delta}$                 | 5.49                     | 0.050                             | 49.37                        |
|             | $La_{1.7}Ca_{0.3}Ni_{0.25}Cu_{0.75}O_{4-\delta}$ | 8.65                     | 0.105                             | 55.92                        |
|             | $La_{1.7}Ca_{0.3}Ni_{0.5}Cu_{0.5}O_{4-\delta}$   | 8.32                     | 0.071                             | 40.41                        |
|             | $La_{1.7}Ca_{0.3}Ni_{0.75}Cu_{0.25}O_{4-\delta}$ | 10.07                    | 0.113                             | 53.20                        |
| 900 °C      | $La_{1.7}Ca_{0.3}CuO_{4-\delta}$                 | 2.23                     | 0.010                             | 7.85                         |
|             | $La_{1.7}Ca_{0.3}Ni_{0.25}Cu_{0.75}O_{4-\delta}$ | 1.23                     | 0.008                             | 45.35                        |
|             | $La_{1.7}Ca_{0.3}Ni_{0.5}Cu_{0.5}O_{4-\delta}$   | 4.42                     | 0.024                             | 12.11                        |
|             | $La_{1.7}Ca_{0.3}Ni_{0.75}Cu_{0.25}O_{4-\delta}$ | 3.06                     | 0.024                             | 13.92                        |

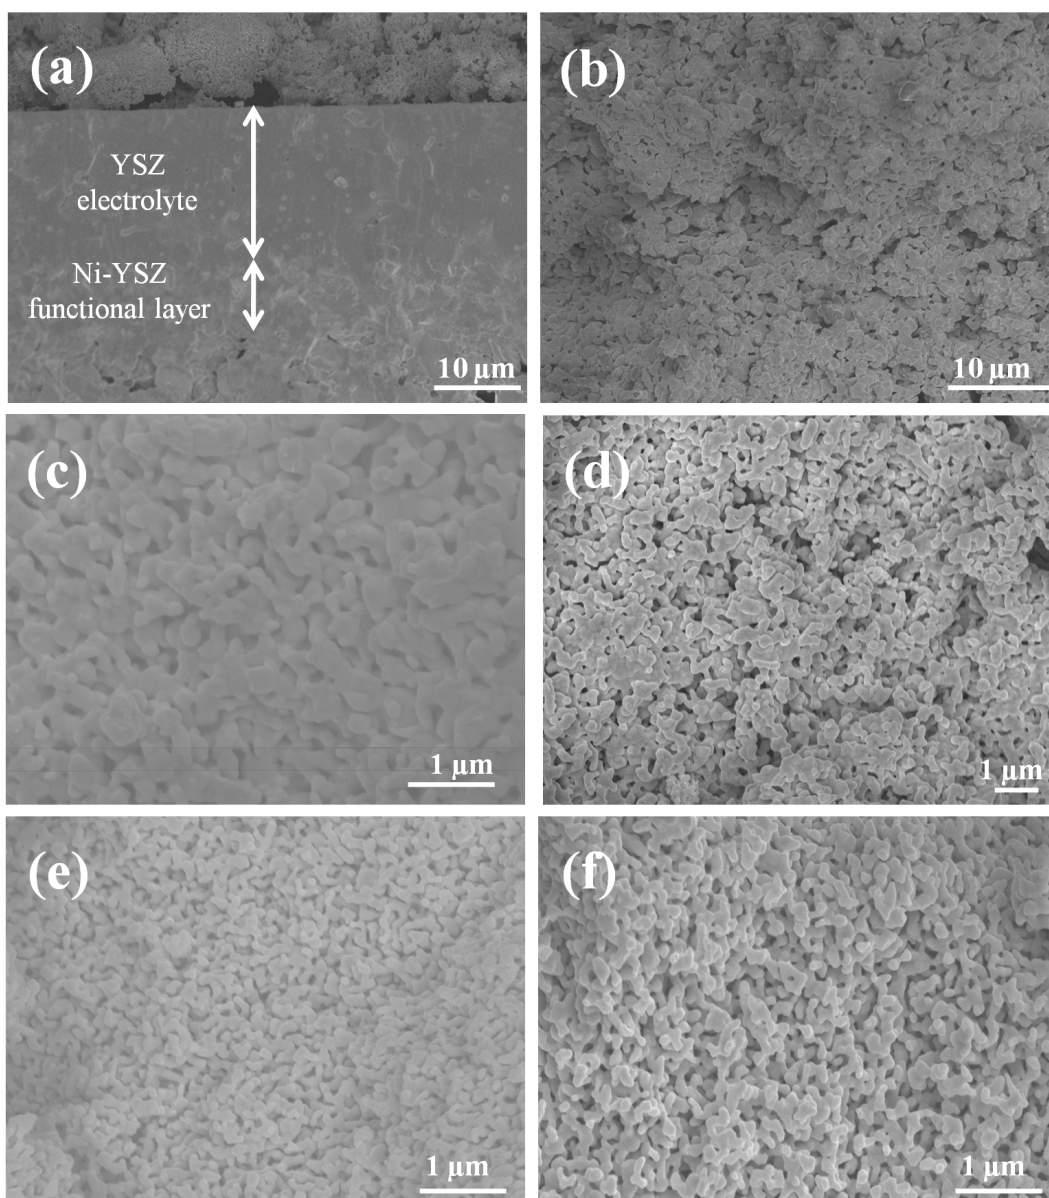

Figure S5. SEM images of Ni-YSZ|YSZ|La<sub>1.7</sub>Ca<sub>0.3</sub>Ni<sub>x</sub>Cu<sub>1-x</sub>O<sub>4-δ</sub> single cell cross section: (a) La<sub>1.7</sub>Ca<sub>0.3</sub>CuO<sub>4-δ</sub>-YSZ, (b) Ni-YSZ anode, (c) La<sub>1.7</sub>Ca<sub>0.3</sub>CuO<sub>4-δ</sub>, (d) La<sub>1.7</sub>Ca<sub>0.3</sub>Ni<sub>0.25</sub>Cu<sub>0.75</sub>O<sub>4-δ</sub>, (e) La<sub>1.7</sub>Ca<sub>0.3</sub>Ni<sub>0.5</sub>Cu<sub>0.5</sub>O<sub>4-δ</sub>, (f) La<sub>1.7</sub>Ca<sub>0.3</sub>Ni<sub>0.75</sub>Cu<sub>0.25</sub>O<sub>4-δ</sub>.

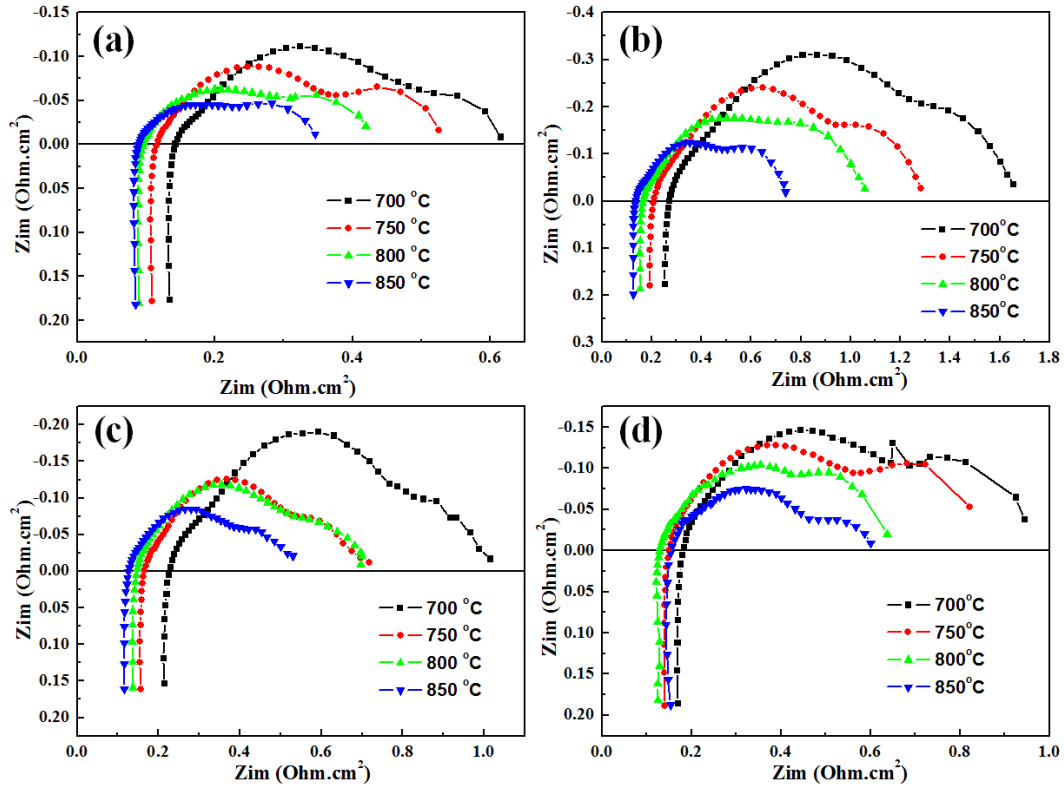

Figure S6. Impedance spectra of single cell Ni-YSZ|YSZ|La<sub>1.7</sub>Ca<sub>0.3</sub>Ni<sub>x</sub>Cu<sub>1-x</sub>O<sub>4-δ</sub>:  
 (a) La<sub>1.7</sub>Ca<sub>0.3</sub>CuO<sub>4-δ</sub>; (b) La<sub>1.7</sub>Ca<sub>0.3</sub>Ni<sub>0.25</sub>Cu<sub>0.75</sub>O<sub>4-δ</sub>;  
 (c) La<sub>1.7</sub>Ca<sub>0.3</sub>Ni<sub>0.5</sub>Cu<sub>0.5</sub>O<sub>4-δ</sub>; (d) La<sub>1.7</sub>Ca<sub>0.3</sub>Ni<sub>0.75</sub>Cu<sub>0.25</sub>O<sub>4-δ</sub>.

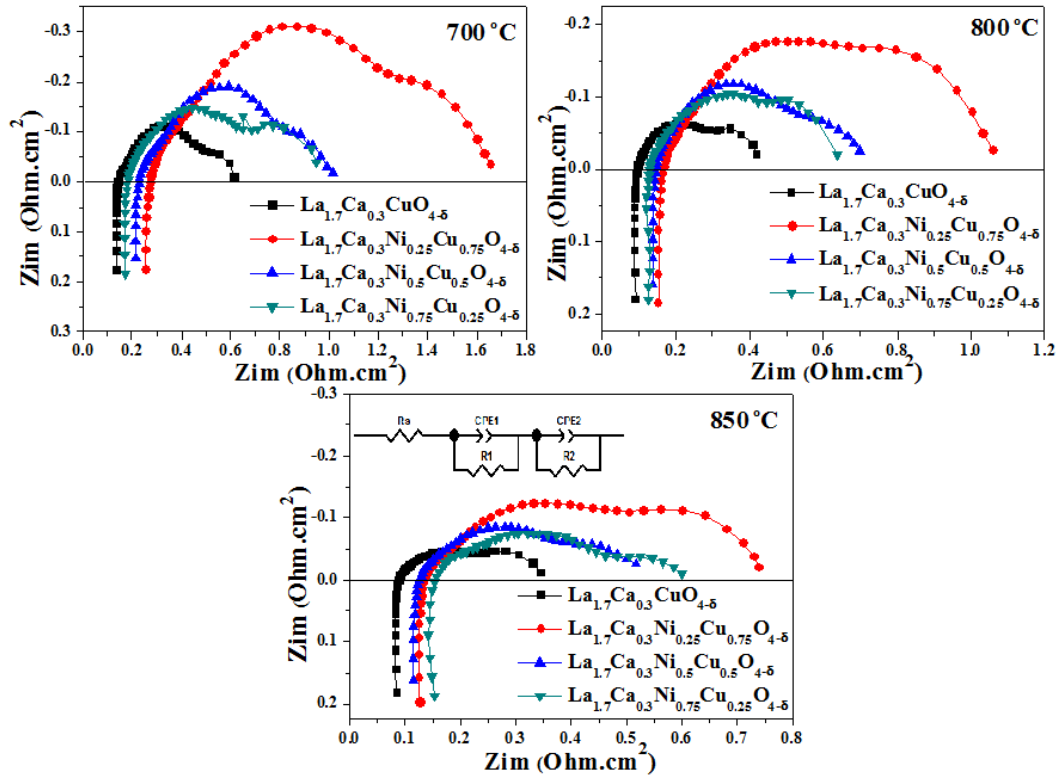

Figure S7. Impedance spectra of single cell Ni-YSZ|YSZ|La<sub>1.7</sub>Ca<sub>0.3</sub>Ni<sub>x</sub>Cu<sub>1-x</sub>O<sub>4-δ</sub> with different cathode materials at operating temperatures.



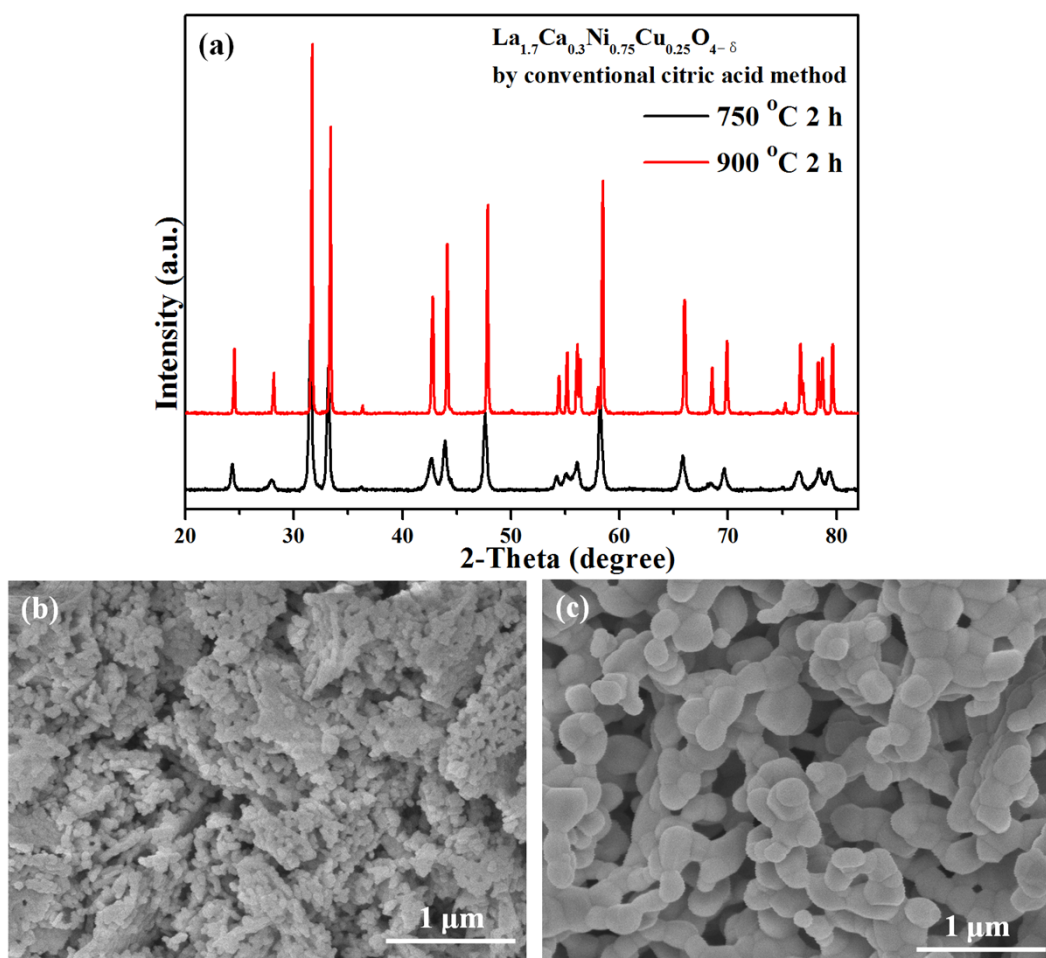

Figure S8. XRD patterns (a) and SEM images of  $\text{La}_{1.7}\text{Ca}_{0.3}\text{Ni}_{0.75}\text{Cu}_{0.25}\text{O}_{4-\delta}$  by conventional citric acid method after calcination at 750 °C (b) and 900 °C (c) for 2 h.

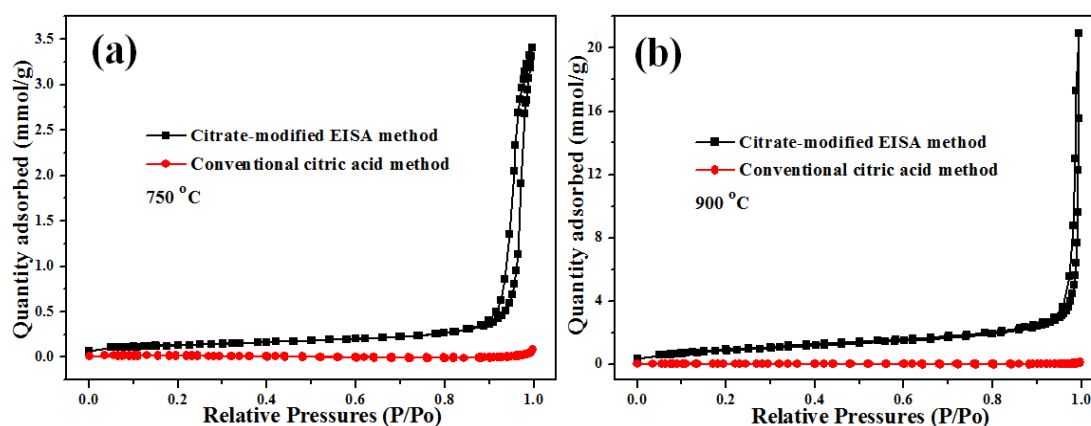

Figure S9.  $\text{N}_2$  adsorption/desorption curves of  $\text{La}_{1.7}\text{Ca}_{0.3}\text{Ni}_{0.75}\text{Cu}_{0.25}\text{O}_{4-\delta}$  after calcination at different temperatures for 2 h: (a) 750 °C, (b) 900 °C. The BET surface areas for  $\text{La}_{1.7}\text{Ca}_{0.3}\text{Ni}_{0.75}\text{Cu}_{0.25}\text{O}_{4-\delta}$  using conventional citric acid method after calcination at 750 and 900 °C for 2 h are 0.72 and 0.25  $\text{m}^2/\text{g}$ , respectively. The pore volumes for  $\text{La}_{1.7}\text{Ca}_{0.3}\text{Ni}_{0.75}\text{Cu}_{0.25}\text{O}_{4-\delta}$  using conventional citric acid method after calcination at 750 and 900 °C for 2 h are both about 0.002  $\text{cm}^3/\text{g}$ .
